# Supplementary material
Source: PubMed Central journal article supplement (PMC4505245)
Supplement: AAC.00551-15_zac008154163so3.pdf [file AAC.00551-15_zac008154163so3.pdf]

## **Supplementary tables**

**Table S1.** Carvacrol HCGP dataset.

**Table S2.** Microarray datasets including both raw data and differentially expressed transcripts in response to carvacrol and thymol.

**Table S3.** Different genes associated to UPR and their transcript level in response to carvacrol and thymol.

| Gene name                         | Orf19 ID   | Description                                                               | Transcript level |        |                  |
|-----------------------------------|------------|---------------------------------------------------------------------------|------------------|--------|------------------|
|                                   |            |                                                                           | Carvacrol        |        | Thymol<br>30 min |
|                                   |            |                                                                           | 5 min            | 30 min |                  |
| <b>Vesicle-mediated transport</b> |            |                                                                           |                  |        |                  |
| <i>ENT2</i>                       | orf19.1444 | Protein with phosphatidylinositol-4,5-bisphosphate binding activity       | 1.62             | 1.49   | 1.02             |
| <i>YSC84</i>                      | orf19.4127 | Ortholog have actin filament binding activity                             | 1.62             | 1.45   | 0.9              |
| <i>UBP15</i>                      | orf19.1777 | Ortholog have ubiquitin-specific protease activity                        | 1.56             | 1.50   | 1.06             |
| <i>PEP3</i>                       | orf19.5543 | Ortholog have cell division site, cytosol localization                    | 1.31             | 1.58   | 0.92             |
| <i>ECM21</i>                      | orf19.4887 | Predicted regulator of endocytosis of plasma membrane proteins            | 1.82             | 1.41   | 0.7              |
| <i>OBPA</i>                       | orf19.3198 | Similar to oxysterol binding protein                                      | 1.55             | 1.10   | 0.87             |
| <i>RVS167</i>                     | orf19.1220 | SH3-domain- and BAR domain-containing protein                             | 2.11             | 1.36   | 0.93             |
| <i>SDS24</i>                      | orf19.5118 | Protein similar to <i>S. cerevisiae</i> Sds24 involved in cell separation | 1.79             | 0.80   | 0.67             |
| <i>SEC18</i>                      | orf19.4993 | Functional homolog of <i>S. cerevisiae</i> Sec18p                         | 1.91             | 1.82   | 0.94             |
| <i>SRO77</i>                      | orf19.1203 | Protein with a role in docking and fusion of post-Golgi vesicles          | 1.76             | 1.51   | 1.11             |
| <i>VPS15</i>                      | orf19.130  | Protein involved in retrograde endosome-to-Golgi protein transport        | 1.66             | 1.26   | 0.94             |
| <i>VPS21</i>                      | orf19.589  | Late endosomal Rab small monomeric GTPase                                 | 2.71             | 2.34   | 1.12             |
| <i>VPS35</i>                      | orf19.6875 | Putative role in vacuolar sorting                                         | 1.92             | 1.52   | 0.90             |
| <i>VPS4</i>                       | orf19.4339 | AAA-ATPase involved in transport from MVB to the vacuole                  | 1.86             | 1.41   | 1.05             |
| <b>Protein degradation</b>        |            |                                                                           |                  |        |                  |
| <i>NPL4</i>                       | orf19.2434 | Putative ubiquitin-binding protein                                        | 1.62             | 1.91   | 1.00             |
| <i>PR26</i>                       | orf19.5793 | Protein proteasomal 26S regulatory subunit                                | 1.97             | 2.11   | 1.07             |
| <i>PRE3</i>                       | orf19.6991 | Putative beta-1 proteasome subunit;                                       | 1.93             | 1.54   | 1.07             |
| <i>PRE5</i>                       | orf19.7178 | Alpha6 subunit of the 20S proteasome;                                     | 2.19             | 1.93   | 1.05             |
| <i>PUP1</i>                       | orf19.7605 | Putative beta 2 subunit of the 20S proteasome                             | 2.08             | 2.29   | 1.06             |
| <i>RPN10</i>                      | orf19.4102 | Putative 19S regulatory particle of the 26S proteasome                    | 1.80             | 1.83   | 1.07             |
| <i>RPN2</i>                       | orf19.5260 | Putative 26S proteasome subunit                                           | 1.79             | 1.79   | 1.03             |
| <i>RPT1</i>                       | orf19.441  | Putative 26S proteasome regulatory subunit 7                              | 1.93             | 2.11   | 1.04             |
| <i>VPS4</i>                       | orf19.4339 | AAA-ATPase involved in transport from MVB to the vacuole                  | 1.86             | 1.41   | 1.05             |

|                     |              |                                                                                                         |      |      |      |
|---------------------|--------------|---------------------------------------------------------------------------------------------------------|------|------|------|
| <b><i>UBP15</i></b> | orf19.1777   | Ortholog have ubiquitin-specific protease activity                                                      | 1.50 | 1.56 | 1.06 |
| <b><i>LAP41</i></b> | orf19.1628   | Putative aminopeptidase yscI precursor                                                                  | 1.75 | 1.91 | 1.23 |
| <b><i>DOA4</i></b>  | orf19.7207   | Ubiquitin hydrolase involved in recycling ubiquitin                                                     | 2.38 | 4.07 | 0.95 |
| <b><i>DOA1</i></b>  | orf19.4829   | WD repeat protein; required for ubiquitin-mediated protein degradation                                  | 2.86 | 2.14 | 0.91 |
| <b><i>CYM1</i></b>  | orf19.7410   | Putative metalloprotease of the mitochondrial intermembrane space                                       | 2.14 | 1.83 | 0.86 |
| <b><i>UBP2</i></b>  | orf19.457    | Ortholog have ubiquitin-specific protease activity                                                      | 2.46 | 2.08 | 1.07 |
| <b><i>CDC48</i></b> | orf19.2340   | Putative microsomal ATPase                                                                              | 1.82 | 1.63 | 1.13 |
| <b><i>PBN1</i></b>  | orf19.3447   | Ortholog have mannosyltransferase activity                                                              | 1.96 | 1.43 | 0.95 |
| <b><i>PRE4</i></b>  | orf19.4230   | 20S proteasome subunit (beta7)                                                                          | 2.01 | 1.90 | 1.14 |
| <b><i>EAR1</i></b>  | orf19.2703   | Specificity factor required for Rsp5p-dependent ubiquitination                                          | 1.91 | 1.44 | 0.91 |
| <b><i>SAN1</i></b>  | orf19.2498   | ubiquitin-protein ligase                                                                                | 1.68 | 1.65 | 1.03 |
| <b><i>RQC1</i></b>  | orf19.1864   | Ortholog have role in ribosome-associated ubiquitin-dependent protein catabolic process and RQC complex | 1.90 | 1.65 | 1.04 |
| <b><i>PNG1</i></b>  | orf19.26     | Putative peptide N-glycanase                                                                            | 1.98 | 1.39 | 0.97 |
| <b><i>MNL1</i></b>  | orf19.834    | Ortholog have carbohydrate binding, mannosyl-oligosaccharide 1,2-alpha-mannosidase activity             | 2.25 | 1.87 | 0.76 |
| <b><i>UBP14</i></b> | orf19.1516   | Ortholog have ubiquitin-specific protease activity                                                      | 1.70 | 1.72 | 1.04 |
| <b><i>UBX5</i></b>  | orf19.4430   | Ortholog have ubiquitin binding activity                                                                | 1.72 | 1.67 | 0.97 |
| <b><i>UBP12</i></b> | orf19.6260   | Ubiquitin-specific protease; cleaves ubiquitin from ubiquitinated proteins                              | 1.20 | 1.54 | 1.12 |
| <b><i>UBP16</i></b> | orf19.3661   | Putative deubiquitinating enzyme                                                                        | 2.33 | 3.97 | 0.76 |
| <b><i>PRB1</i></b>  | orf19.2242   | Endoprotease B                                                                                          | 2.33 | 3.97 | 0.76 |
| <b><i>LAP4</i></b>  | orf19.6671   | Aminopeptidase I                                                                                        | 1.23 | 1.53 | 1.03 |
| <b><i>RPN9</i></b>  | orf19.1993   | Protein with role in proteasome assembly                                                                | 1.52 | 1.61 | 1.24 |
| <b><i>RPN12</i></b> | orf19.213    | Ortholog have role in ubiquitin-dependent protein catabolic process                                     | 2.28 | 2.17 | 0.97 |
| <b><i>HOD1</i></b>  | orf19.3122.2 | Ortholog have role in exocytosis, proteasome assembly                                                   | 1.62 | 2.01 | 0.97 |
| <b><i>UBP2</i></b>  | orf19.457    | Ortholog have ubiquitin-specific protease activity                                                      | 2.08 | 2.46 | 1.07 |
| <b><i>ASI3</i></b>  | orf19.6440   | Ortholog have ubiquitin-protein ligase activity                                                         | 1.57 | 1.16 | 0.83 |
| <b><i>DDI1</i></b>  | orf19.7258   | Putative DNA damage inducible v-SNARE binding protein                                                   | 1.62 | 1.16 | 1.03 |
| <b><i>PIM1</i></b>  | orf19.522    | ATP-dependent Lon protease                                                                              | 1.07 | 1.58 | 1.02 |
| <b><i>PRE1</i></b>  | orf19.4025   | Putative beta 4 subunit of the 20S proteasome                                                           | 1.85 | 1.73 | 0.85 |

|                              |              |                                                                                                                  |       |      |      |
|------------------------------|--------------|------------------------------------------------------------------------------------------------------------------|-------|------|------|
| <i>PRE3</i>                  | orf19.6991   | Putative beta-1 proteasome subunit                                                                               | 1.54  | 1.93 | 1.07 |
| <i>PRE9</i>                  | orf19.350    | Alpha3 (C9) subunit of the 20S proteasome                                                                        | 1.93  | 1.54 | 1.07 |
| <i>PUP2</i>                  | orf19.709    | Alpha5 subunit of the 20S proteasome                                                                             | 1.07  | 0.50 | 0.92 |
| <i>RPT2</i>                  | orf19.5440   | Putative ATPase of the 19S regulatory particle of the 26S proteasome                                             | 1.24  | 1.55 | 1.01 |
| <b>Protein folding</b>       |              |                                                                                                                  |       |      |      |
| <i>FMO1</i>                  | orf19.3307   | Flavin-containing monooxygenase                                                                                  | 1.63  | 1.40 | 1.11 |
| <i>HSP104</i>                | orf19.6387   | Heat-shock protein                                                                                               | 3.61  | 3.49 | 0.82 |
| <i>HSP70</i>                 | orf19.4980   | Putative hsp70 chaperone                                                                                         | 5.81  | 1.66 | 0.60 |
| <i>HSP78</i>                 | orf19.882    | Heat-shock protein                                                                                               | 4.94  | 4.09 | 0.60 |
| <i>TRX1</i>                  | orf19.7611   | Thioredoxin                                                                                                      | 1.67  | 2.16 | 0.90 |
| <i>RBPI</i>                  | orf19.6452   | Peptidyl-prolyl cis-trans isomerase                                                                              | 1.19  | 1.58 | 0.90 |
| <i>JEM1</i>                  | orf19.3592   | Protein acting with Scj1p and Kar2p (BiP) in protein folding and ER-associated degradation of misfolded proteins | 1.13  | 1.50 | 1.06 |
| <i>CYP5</i>                  | orf19.7421   | Putative peptidyl-prolyl cis-trans isomerase                                                                     | 1.21  | 1.52 | 1.19 |
| <b>Amino acid metabolism</b> |              |                                                                                                                  |       |      |      |
| <i>SHM2</i>                  | orf19.5750   | Cytoplasmic serine hydroxymethyltransferase                                                                      | 2.20  | 2.32 | 1.20 |
| <i>SER33</i>                 | orf19.5263   | Predicted enzyme of amino acid biosynthesis                                                                      | 2.22  | 1.72 | 1.19 |
| <i>STR2</i>                  | orf19.1033   | Ortholog have cystathionine gamma-synthase activity                                                              | 2.69  | 1.08 | 0.99 |
| <i>TRP5</i>                  | orf19.4718   | Predicted tryptophan synthase                                                                                    | 2.66  | 1.53 | 1.03 |
| <i>LYS4</i>                  | orf19.3846   | Homoaconitase                                                                                                    | 3.66  | 1.98 | 0.61 |
| <i>LYS1</i>                  | orf19.1789.1 | Saccharopine dehydrogenase (biosynthetic)                                                                        | 3.33  | 1.41 | 1.18 |
| <i>LYS2</i>                  | orf19.2970   | Heterodimeric alpha-aminoadipate reductase large subunit                                                         | 3.02  | 1.76 | 1.00 |
| <i>SER1</i>                  | orf19.5484   | Putative 3-phosphoserine aminotransferase                                                                        | 1.59  | 1.27 | 1.16 |
| <i>MET15</i>                 | orf19.5645   | O-acetylhomoserine O-acetylserine sulfhydrylase                                                                  | 5.54  | 1.10 | 0.49 |
| <i>MET10</i>                 | orf19.4076   | Sulfite reductase; role in sulfur amino acid metabolism;                                                         | 1.65  | 2.11 | 0.51 |
| <i>ARO8</i>                  | orf19.2098   | Aromatic transaminase of the Ehrlich fusel oil                                                                   | 3.69  | 1.98 | 1.05 |
| <i>ARO3</i>                  | orf19.1517   | 3-deoxy-D-arabinoheptulosonate-7-phosphate synthase                                                              | 2.25  | 1.02 | 0.97 |
| <i>ARG1</i>                  | orf19.7469   | Argininosuccinate synthase; arginine synthesis                                                                   | 42.93 | 2.79 | 1.32 |

|                                |            |                                                                                                                                 |      |      |      |
|--------------------------------|------------|---------------------------------------------------------------------------------------------------------------------------------|------|------|------|
| <i>AAT1</i>                    | orf19.3554 | Aspartate aminotransferase                                                                                                      | 2.74 | 2.08 | 0.74 |
| <b><i>Lipid metabolism</i></b> |            |                                                                                                                                 |      |      |      |
| <i>LCB4</i>                    | orf19.5257 | Putative sphingosine kinase                                                                                                     | 1.92 | 1.95 | 0.93 |
| <i>PLC2</i>                    | orf19.5797 | Phosphatidylinositol (PtdIns)-specific phospholipase C (PI-PLC);                                                                | 1.65 | 1.94 | 1.07 |
| <i>TGL1</i>                    | orf19.2050 | Ortholog have sterol esterase activity                                                                                          | 2.04 | 1.60 | 0.78 |
| <i>ROG1</i>                    | orf19.3991 | Ortholog have role in cellular lipid metabolic process and cytosol localization                                                 | 1.84 | 1.13 | 1.09 |
| <i>OBPA</i>                    | orf19.3198 | Similar to oxysterol binding protein                                                                                            | 1.55 | 1.10 | 0.87 |
| <i>ORM1</i>                    | orf19.5751 | Putative endoplasmic reticulum membrane protein                                                                                 | 1.64 | 1.33 | 1.08 |
| <i>YDC1</i>                    | orf19.3104 | Alkaline dihydroceramidase; involved in sphingolipid metabolism                                                                 | 3.42 | 2.20 | 0.86 |
| <i>VPS4</i>                    | orf19.4339 | AAA-ATPase involved in transport from MVB to the vacuole                                                                        | 1.86 | 1.41 | 1.05 |
| <i>GPII5</i>                   | orf19.2529 | Protein involved in the synthesis of glycosylphosphatidylinositol anchors                                                       | 2.36 | 2.87 | 0.84 |
| <i>ALG13</i>                   | orf19.6025 | Protein with N-acetylglucosaminyl-diphosphodolichol N-acetylglucosaminyl-transferase activity                                   | 1.97 | 2.33 | 1.15 |
| <i>SMP2</i>                    | orf19.1462 | Putative Mg <sup>2+</sup> -dependent phosphatidate phosphatase                                                                  | 1.52 | 1.07 | 1.36 |
| <i>HAL22</i>                   | orf19.105  | Putative phosphoadenosine-5'-phosphate or 3'-phosphoadenosine 5'-phosphosulfate phosphatase; possible role in sulfur recycling; | 2.01 | 2.98 | 0.90 |
| <i>POX1</i>                    | orf19.5723 | Predicted acyl-CoA oxidase                                                                                                      | 1.89 | 1.45 | 0.95 |
| <i>NPR1</i>                    | orf19.6232 | Predicted serine/threonine protein kinase, involved in regulation of ammonium transport; induced in core stress response;       | 4.77 | 2.36 | 0.79 |
| <i>PBN1</i>                    | orf19.3447 | Protein with mannosyltransferase activity                                                                                       | 1.96 | 1.43 | 0.95 |
| <i>GPII3</i>                   | orf19.832  | Major facilitator superfamily protein                                                                                           | 1.87 | 1.23 | 1.08 |
| <i>PDR16</i>                   | orf19.1027 | Phosphatidylinositol transfer protein                                                                                           | 4.85 | 2.94 | 0.94 |
| <i>PEX5</i>                    | orf19.5640 | Protein required for PTS1-mediated peroxisomal protein import                                                                   | 2.97 | 2.00 | 1.12 |
| <i>SCT1</i>                    | orf19.1289 | Putative glycerol-3-phosphate O-acyltransferase; fungal-specific                                                                | 2.14 | 1.03 | 0.92 |
| <i>HFD1</i>                    | orf19.6066 | Hexadecenal dehydrogenase                                                                                                       | 2.14 | 2.09 | 1.02 |
| <i>YJU3</i>                    | orf19.4864 | Protein with acylglycerol lipase activity and serine hydrolase activity                                                         | 1.55 | 1.51 | 0.90 |
| <i>YFT2</i>                    | orf19.1158 | Protein required for normal ER membrane biosynthesis                                                                            | 1.95 | 1.54 | 0.98 |
| <i>YEH1</i>                    | orf19.1887 | Protein with sterol esterase activity                                                                                           | 1.34 | 1.75 | 1.06 |

|                           |            |                                                                           |       |      |      |
|---------------------------|------------|---------------------------------------------------------------------------|-------|------|------|
| <i>GPII5</i>              | orf19.2529 | Protein involved in the synthesis of glycosylphosphatidylinositol anchors | 2.36  | 2.87 | 0.84 |
| <i>IFA38</i>              | orf19.3859 | Putative microsomal beta-keto-reductase                                   | 1.48  | 2.12 | 1.05 |
| <i>PEX6</i>               | orf19.3573 | Protein with ATPase activity, protein heterodimerization activity         | 1.51  | 1.72 | 1.12 |
| <i>PLC1</i>               | orf19.5506 | Phosphoinositide-specific phospholipase C (PI-PLC)                        | 1.34  | 1.50 | 1.18 |
| <i>PLC2</i>               | orf19.5797 | Phosphatidylinositol (PtdIns)-specific phospholipase C (PI-PLC)           | 1.65  | 1.94 | 1.07 |
| <i>RTA2</i>               | orf19.24   | Flippase                                                                  | 1.14  | 3.70 | 1.06 |
| <i>MIT1</i>               | orf19.4077 | Mannosylinositol phosphorylceramide (MIPC) synthase catalytic subunit     | 1.22  | 1.50 | 1.01 |
| <i>MCR1</i>               | orf19.3507 | NADH-cytochrome-b5 reductase                                              | 1.20  | 1.66 | 1.13 |
| <i>ERG4</i>               | orf19.5379 | Protein similar to sterol C-24 reductase                                  | 1.34  | 2.01 | 1.16 |
| <i>ERG2</i>               | orf19.6026 | C-8 sterol isomerase; enzyme of ergosterol biosynthesis                   | 0.68  | 1.87 | 1.40 |
| <b>Cellular transport</b> |            |                                                                           |       |      |      |
| <i>CDR1</i>               | orf19.6000 | Multidrug transporter of ABC superfamily                                  | 4.89  | 2.76 | 0.61 |
| <i>GAP2</i>               | orf19.6993 | General amino acid permease                                               | 1.22  | 1.73 | 1.34 |
| <i>GNPI</i>               | orf19.1193 | Asparagine and glutamine permease                                         | 1.44  | 2.10 | 4.06 |
| <i>AQY1</i>               | orf19.2849 | Aquaporin water channel                                                   | 1.81  | 1.99 | 0.35 |
| <i>ITR1</i>               | orf19.3526 | Inositol transporter required for uptake of exogenous inositol            | 1.62  | 1.88 | 1.08 |
| <i>AGP3</i>               | orf19.3795 | Serine transporter with possible role in assimilation of sulfur           | 1.60  | 2.88 | 1.06 |
| <i>HGT20</i>              | orf19.1587 | Glucose transporter of the major facilitator superfamily                  | 1.50  | 1.58 | 0.70 |
| <i>ATM1</i>               | orf19.1077 | Member of MDR subfamily of ABC family                                     | 1.53  | 2.03 | 0.83 |
| <i>SUL2</i>               | orf19.2738 | Protein described as a sulfate transporter                                | 10.63 | 3.45 | 0.30 |
| <i>MEP1</i>               | orf19.1614 | Ammonium permease                                                         | 5.97  | 4.78 | 0.72 |
| <i>HIP1</i>               | orf19.4940 | Histidine permease                                                        | 4.11  | 2.24 | 5.30 |
| <i>HAK1</i>               | orf19.6249 | Putative potassium transporter                                            | 2.02  | 1.23 | 0.51 |
| <i>CRP1</i>               | orf19.4784 | Copper transporter of the plasma membrane                                 | 1.87  | 0.65 | 0.44 |
| <b>Cell wall proteins</b> |            |                                                                           |       |      |      |
| <i>ALS1</i>               | orf19.5741 | Adhesin                                                                   | 1.65  | 3.82 | 0.43 |
| <i>ECM29</i>              | orf19.6773 | Putative scaffold protein                                                 | 3.62  | 3.03 | 1.01 |
| <i>MNN4</i>               | orf19.2881 | Regulator of mannosylphosphorylation of N-linked mannans to cell wall     | 1.42  | 2.44 | 0.87 |

|                     |              |                                                                       |      |      |      |
|---------------------|--------------|-----------------------------------------------------------------------|------|------|------|
|                     |              | proteins                                                              |      |      |      |
| <b><i>ECM15</i></b> | orf19.7436.1 | Protein of unknown function; predicted role in cell wall organization | 2.30 | 1.67 | 0.85 |
| <b><i>DDR48</i></b> | orf19.4082   | Immunogenic stress-associated protein                                 | 1.82 | 4.54 | 0.45 |
| <b><i>PHR1</i></b>  | orf19.3829   | Glycosidase of cell surface                                           | 0.94 | 2.25 | 1.20 |
| <b><i>BMT4</i></b>  | orf19.5612   | Beta-mannosyltransferase                                              | 1.66 | 1.84 | 1.41 |
